# Supplementary material
Source: PubMed Central journal article supplement (PMC6443094)
Supplement: NIHMS1519594-supplement-Figs.pdf [file NIHMS1519594-supplement-Figs.pdf]

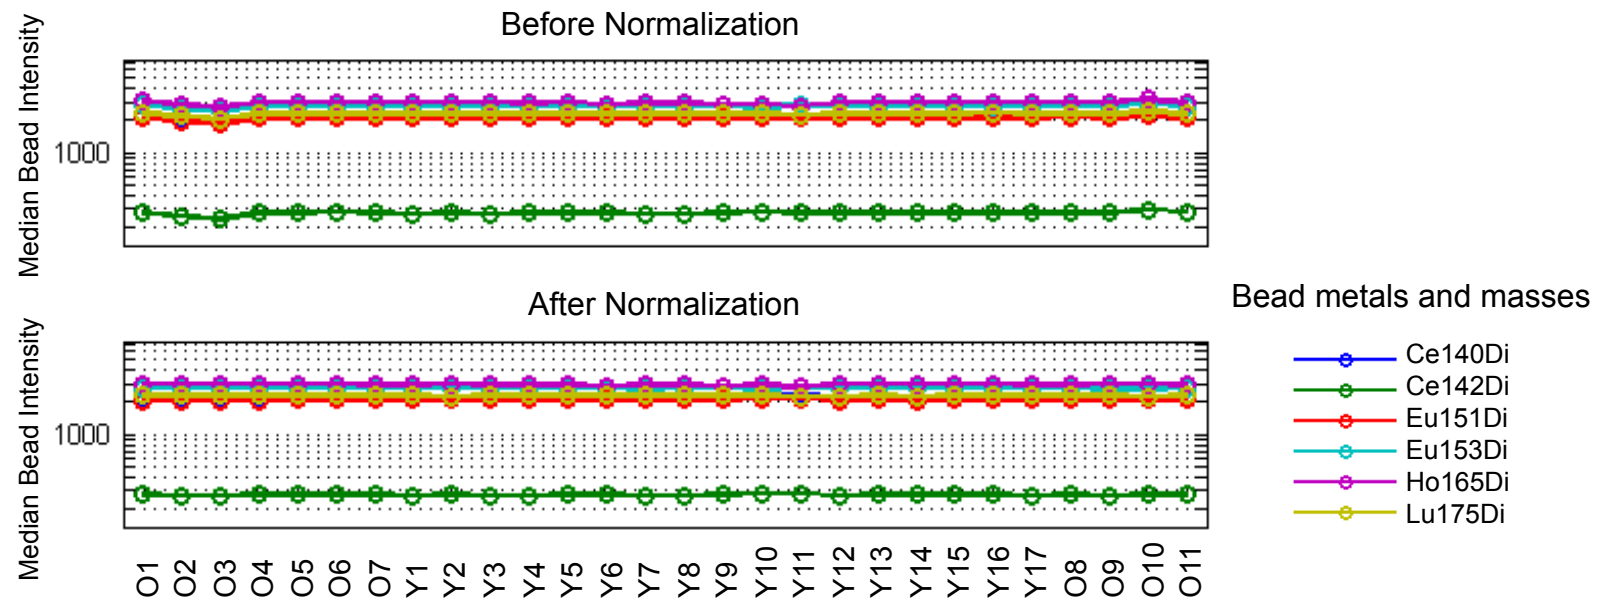

Supplementary Fig. 1. Normalization of acquired CyTOF data of young (Y1 - Y17) and older (O1 - O11) adults was performed with bead standards as previously done.

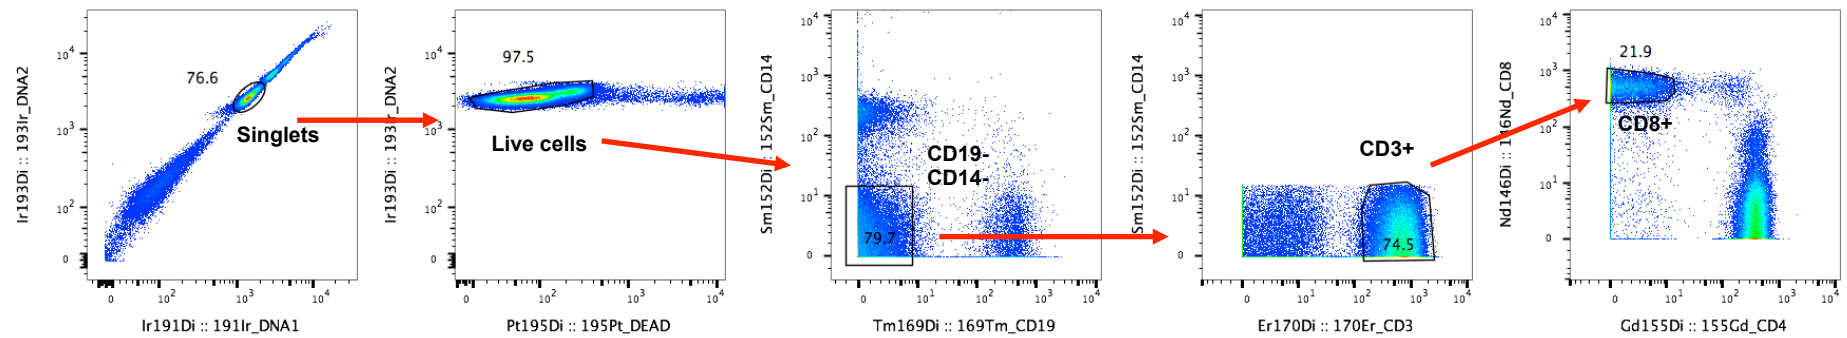

Supplementary Fig. 2. Representative gating strategies for CD8+ T cells in cytometry by CyTOF data. PBMCs isolated freshly from a healthy donor were stained with the indicated antibodies. In the singlets gate, dead cells exclusion was performed. Subsequent gates were designed to identify CD8+ T cells (CD19- CD14- CD3+ CD8+).

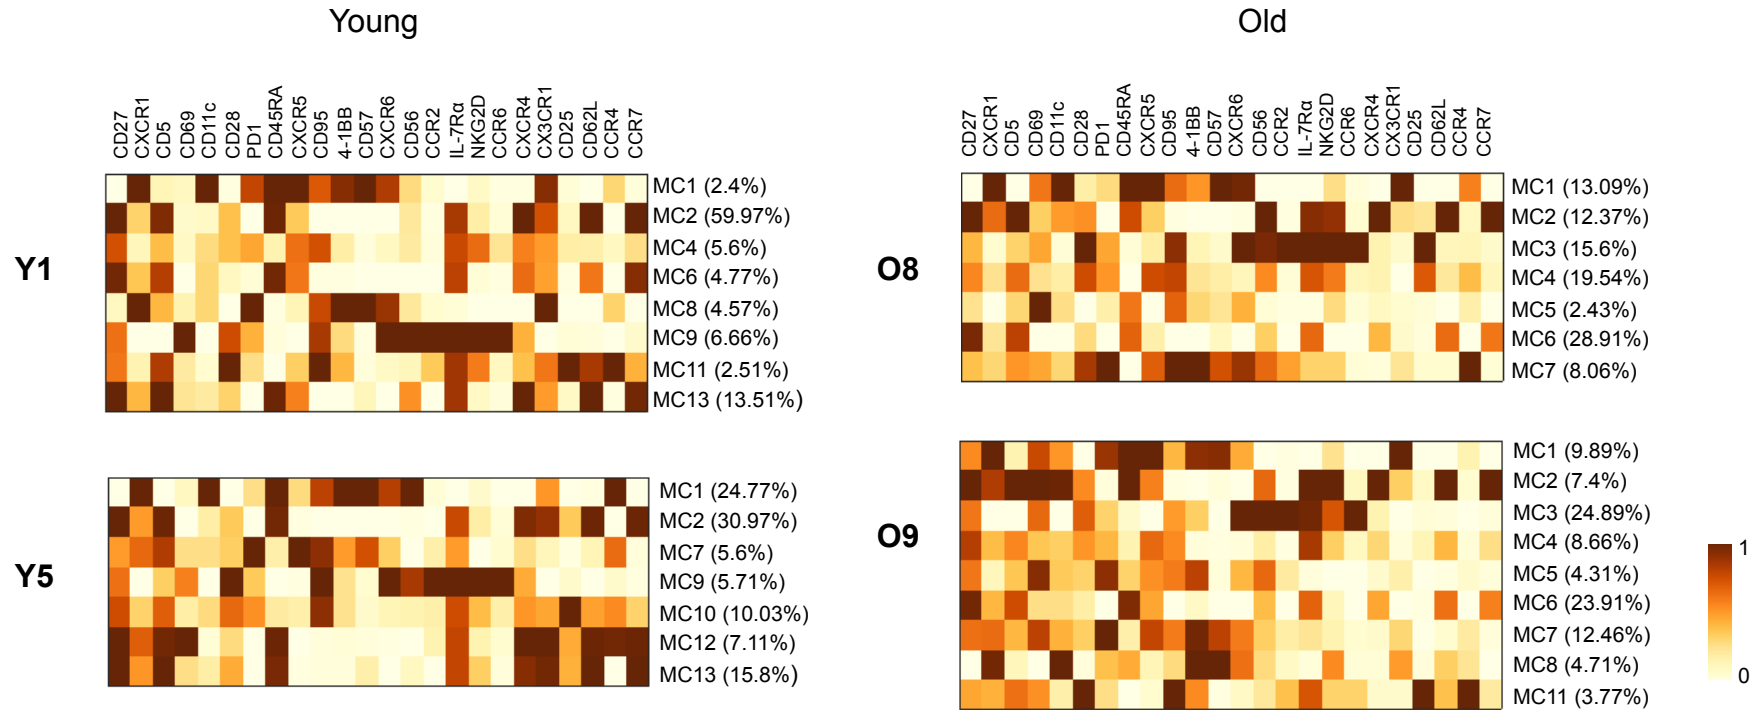

Supplementary Fig. 3. Heatmaps of representative donors show mean molecular expression of metaclusters detected in CD8+ T cells by PhenoGraph meta-clustering based on 24 molecules indicated by the column labels. Row labels are metacluster (MC) identifications (IDs) and percentage of individual metaclusters in CD8+ T cells of each donor. Values are scaled between 0 and 1 for each molecule. Y, young adults. O, older adults.
